# Supplementary material
Source: ML conference proceedings conference paper supplement (https://proceedings.mlr.press/v33/blanchard14.html)
Supplement: Supplementary file [file blanchard14-supp.pdf]

Supplemental Material for the AISTATS 2014  
paper  
“Decontamination of Mutually Contaminated  
Models”

Gilles Blanchard and Clayton Scott

## A Proofs for Section 3

### A.1 $\kappa^*$ and $\widehat{\kappa}$ are well-defined

**Lemma A.1.** *The maximum operation in the definition of  $\kappa^*$  and  $\widehat{\kappa}$  is well-defined, that is, the outside supremum is attained at at least one point.*

We prove the statement for

$$\kappa^* = \max_{\boldsymbol{\mu}} \inf_{C \in \mathcal{C}: F_{\boldsymbol{\mu}}(C) > 0} \frac{F_0(C)}{F_{\boldsymbol{\mu}}(C)}.$$

The argument for  $\widehat{\kappa}$  is similar. Denote  $G(\boldsymbol{\mu}) = \kappa^*(F_0|F_{\boldsymbol{\mu}}) = \inf_{C \in \mathcal{C}: F_{\boldsymbol{\mu}}(C) > 0} \frac{F_0(C)}{F_{\boldsymbol{\mu}}(C)}$  the maximum proportion of the mixture  $F_{\boldsymbol{\mu}}$  in the distribution  $F_0$ .

We argue that  $G$  is an upper semicontinuous function. To see this, define for each  $C \in \mathcal{C}$  the function  $g_C : S_M \rightarrow [0, \infty]$  as

$$g_C(\boldsymbol{\mu}) := \begin{cases} \frac{F_0(C)}{F_{\boldsymbol{\mu}}(C)} & \text{if } F_{\boldsymbol{\mu}}(C) > 0; \\ +\infty & \text{if } F_{\boldsymbol{\mu}}(C) = 0. \end{cases}$$

Then  $f_C$  is an upper semicontinuous function: if  $\boldsymbol{\mu} \in S_M$  is such that  $F_{\boldsymbol{\mu}}(C) > 0$ , then  $f_C$  is continuous at point  $\boldsymbol{\mu}$ . Otherwise,  $f_C(\boldsymbol{\mu}) = \infty$  and  $f_C$  is trivially upper semicontinuous at point  $\boldsymbol{\mu}$ . Clearly, one has  $G(\boldsymbol{\mu}) = \inf_{C \in \mathcal{C}} f_C(\boldsymbol{\mu})$ ; as an infimum of upper semicontinuous functions, it is itself upper semicontinuous, and therefore attains its maximum on the compact set  $S_M$ .

### A.2 Proof of Proposition 2

Point (a): We apply condition **P1** for all  $k, i$  with  $\delta_{k,i} = c\delta_i/k^2$ . By the union bound, with probability at least  $1 - \sum_{i=0}^M \delta_i$ , it holds simultaneously for all  $k \geq 1$  and  $i = 0, \dots, M$  that

$$\forall k \geq 1, \quad \forall i \in \{0, \dots, M\} : \quad \sup_{C \in \mathcal{C}_k} \left| F_i(C) - \widehat{F}_i(C) \right| \leq \epsilon_i^k (c\delta_i k^{-2}) \quad (\text{S.1})$$

Recall the notation (from the proof of Lemma A.1)  $G(\boldsymbol{\mu}) = \inf_{C \in \mathcal{C}: F_{\boldsymbol{\mu}}(C) > 0} \frac{F_0(C)}{F_{\boldsymbol{\mu}}(C)}$  and introduce

$$\widehat{G}(\boldsymbol{\mu}) := \inf_k \inf_{C \in \mathcal{C}_k} \frac{\widehat{F}_0(C) + \epsilon_0^k (c\delta_0 k^{-2})}{\left(\widehat{F}_{\boldsymbol{\mu}}(C) - \sum_i \nu_i \epsilon_i^k (c\delta_i k^{-2})\right)_+}.$$

Observe that when (S.1) is satisfied, this implies that for all  $\boldsymbol{\mu} \in S_M$ , one has  $G(\boldsymbol{\mu}) \leq \widehat{G}(\boldsymbol{\mu})$ . Taking the maximum over  $\boldsymbol{\mu}$  yields the first point.

Point (b): let  $\epsilon > 0$  be an arbitrary positive constant. For any  $\boldsymbol{\mu} \in S_M$ , let  $C_{\boldsymbol{\mu}} \in \mathcal{C}$  with  $F_{\boldsymbol{\mu}}(C_{\boldsymbol{\mu}}) > 0$  be such that  $\frac{F_0(C_{\boldsymbol{\mu}})}{F_{\boldsymbol{\mu}}(C_{\boldsymbol{\mu}})} \leq \kappa^* + \epsilon/4$ .

By continuity of the function  $\boldsymbol{\mu} \mapsto F_{\boldsymbol{\mu}}(C)$  for any fixed  $C$ , there exists for each  $\boldsymbol{\mu} \in S_M$  an open neighborhood  $N_{\boldsymbol{\mu}}$  of  $\boldsymbol{\mu}$  for which both of the following conditions are realized for all  $\boldsymbol{\mu}' \in N_{\boldsymbol{\mu}}$ :

$$\frac{F_0(C_{\boldsymbol{\mu}})}{F_{\boldsymbol{\mu}'}(C_{\boldsymbol{\mu}})} \leq \kappa^* + \frac{\epsilon}{2}, \quad (\text{S.2})$$

$$\text{and } F_{\boldsymbol{\mu}'}(C_{\boldsymbol{\mu}}) \geq \frac{1}{2} F_{\boldsymbol{\mu}}(C_{\boldsymbol{\mu}}). \quad (\text{S.3})$$

(For the second condition, we have used the fact that  $F_{\boldsymbol{\mu}}(C_{\boldsymbol{\mu}}) > 0$ ). By compactness of  $S_M$ , there exists a finite subset  $S_M^\epsilon$  of  $S_M$  such that  $(N_{\boldsymbol{\mu}})_{\boldsymbol{\mu} \in S_M^\epsilon}$  covers  $S_M$ .

Denote  $F_{\min}^\epsilon := \frac{1}{2} \min_{\boldsymbol{\mu} \in S_M^\epsilon} F_{\boldsymbol{\mu}}(C_{\boldsymbol{\mu}})$ ; it is a positive quantity since  $F_{\boldsymbol{\mu}}(C_{\boldsymbol{\mu}}) > 0$  for any  $\boldsymbol{\mu}$ , and  $S_M^\epsilon$  is finite. For each  $\boldsymbol{\mu} \in S_M$ , denote  $\zeta(\boldsymbol{\mu})$  an arbitrary element of the finite net  $S_M^\epsilon$  such that  $\boldsymbol{\mu} \in N_{\zeta(\boldsymbol{\mu})}$ . By property (S.2), we have

$$\sup_{\boldsymbol{\mu} \in S_M} \frac{F_0(C_{\zeta(\boldsymbol{\mu})})}{F_{\boldsymbol{\mu}}(C_{\zeta(\boldsymbol{\mu})})} \leq \max_{\boldsymbol{\mu} \in S_M^\epsilon} \sup_{\boldsymbol{\mu}' \in N_{\boldsymbol{\mu}}} \frac{F_0(C_{\boldsymbol{\mu}})}{F_{\boldsymbol{\mu}'}(C_{\boldsymbol{\mu}})} \leq \kappa^* + \frac{\epsilon}{2}, \quad (\text{S.4})$$

and by property (S.3):

$$\inf_{\boldsymbol{\mu} \in S_M} F_{\boldsymbol{\mu}}(C_{\zeta(\boldsymbol{\mu})}) \geq \min_{\boldsymbol{\mu} \in S_M^\epsilon} \inf_{\boldsymbol{\mu}' \in N_{\boldsymbol{\mu}}} F_{\boldsymbol{\mu}'}(C_{\boldsymbol{\mu}}) \geq F_{\min}^\epsilon. \quad (\text{S.5})$$

Denote  $\mathcal{C}_\epsilon := \{C_{\boldsymbol{\mu}}, \boldsymbol{\mu} \in S_M^\epsilon\}$ . Let  $\eta \in (0, F_{\min}^\epsilon/2)$  be another arbitrary positive constant. Consider the distribution  $Q = \frac{1}{M+1} \sum_{i=0}^M F_i$ , to which we apply condition **P2**. This entails that for each individual  $C \in \mathcal{C}$  there exists a  $k_C$  and  $\widetilde{C} \in \mathcal{C}_{k_C}$  with

$$Q(C \Delta \widetilde{C}) \leq \frac{\eta}{M+1},$$

implying for all  $i \in \{0, \dots, M\}$ :

$$\left| F_i(C) - F_i(\widetilde{C}) \right| \leq F_i(C \Delta \widetilde{C}) \leq (M+1)Q(C \Delta \widetilde{C}) \leq \eta,$$

and then also for all  $\boldsymbol{\mu} \in S_M$ :

$$\left| F_{\boldsymbol{\mu}}(\widetilde{C}) - F_{\boldsymbol{\mu}}(C) \right| \leq \sum_{i=1}^M \mu_i \left| F_i(C) - F_i(\widetilde{C}) \right| \leq \eta.$$

In what follows we use the shortened notation  $\varepsilon_i^k \equiv \varepsilon_i^k(c\delta_i k^{-2})$ , and further define  $\underline{\varepsilon}(\varepsilon, \eta) := \max_i \max_{C \in \mathcal{C}_\varepsilon} \varepsilon_i^{kC}$ . For fixed  $(\varepsilon, \eta)$ , the quantity  $\underline{\varepsilon}(\varepsilon, \eta)$  is defined as a maximum of a finite number of functions decreasing to 0 as  $\mathbf{n} \rightarrow \infty$ , and therefore  $\underline{\varepsilon}$  also decreases to zero. Below, we assume that all components of  $\mathbf{n}$  are chosen big enough so that  $F_{\min}^\varepsilon - \eta - 2\underline{\varepsilon}(\varepsilon, \eta) > 0$ . It holds with probability  $1 - \sum_{i=0}^M \delta_i$  that

$$\begin{aligned}
\widehat{\kappa} &\leq \sup_{\boldsymbol{\mu} \in S_M} \inf_k \inf_{C \in \mathcal{C}_k} \frac{F_0(C) + 2\varepsilon_0^k}{(F_{\boldsymbol{\mu}}(C) - 2\sum_i \mu_i \varepsilon_i^k)_+} \\
&\leq \sup_{\boldsymbol{\mu} \in S_M} \inf_{C \in \mathcal{C}} \frac{F_0(\tilde{C}) + 2\varepsilon_0^{kC}}{(F_{\boldsymbol{\mu}}(\tilde{C}) - 2\sum_i \mu_i \varepsilon_i^{kC})_+} \\
&\leq \sup_{\boldsymbol{\mu} \in S_M} \inf_{C \in \mathcal{C}} \frac{F_0(C) + \eta + 2\varepsilon_0^{kC}}{(F_{\boldsymbol{\mu}}(C) - \eta - 2\sum_i \mu_i \varepsilon_i^{kC})_+} \\
&\leq \sup_{\boldsymbol{\mu} \in S_M} \frac{F_0(C_{\zeta(\boldsymbol{\mu})}) + \eta + 2\varepsilon_0^{kC_{\zeta(\boldsymbol{\mu})}}}{(F_{\boldsymbol{\mu}}(C_{\zeta(\boldsymbol{\mu})}) - \eta - 2\sum_i \mu_i \varepsilon_i^{kC_{\zeta(\boldsymbol{\mu})}})_+} \\
&\leq \sup_{\boldsymbol{\mu} \in S_M} \frac{F_0(C_{\zeta(\boldsymbol{\mu})}) + \eta + 2\underline{\varepsilon}(\varepsilon, \eta)}{(F_{\boldsymbol{\mu}}(C_{\zeta(\boldsymbol{\mu})}) - \eta - 2\underline{\varepsilon}(\varepsilon, \eta))_+} \\
&\leq \left( \sup_{\boldsymbol{\mu} \in S_M} \frac{F_{\boldsymbol{\mu}}(C_{\zeta(\boldsymbol{\mu})})}{(F_{\boldsymbol{\mu}}(C_{\zeta(\boldsymbol{\mu})}) - \eta - 2\underline{\varepsilon}(\varepsilon, \eta))_+} \right) \sup_{\boldsymbol{\mu} \in S_M} \frac{F_0(C_{\zeta(\boldsymbol{\mu})}) + \eta + 2\underline{\varepsilon}(\varepsilon, \eta)}{F_{\boldsymbol{\mu}}(C_{\zeta(\boldsymbol{\mu})})} \\
&\leq \left( \frac{F_{\min}^\varepsilon}{(F_{\min}^\varepsilon - \eta - 2\underline{\varepsilon}(\varepsilon, \eta))_+} \right) \left( \sup_{\boldsymbol{\mu} \in S_M} \frac{F_0(C_{\zeta(\boldsymbol{\mu})})}{F_{\boldsymbol{\mu}}(C_{\zeta(\boldsymbol{\mu})})} + \sup_{\boldsymbol{\mu} \in S_M} \frac{\eta + 2\underline{\varepsilon}(\varepsilon, \eta)}{F_{\boldsymbol{\mu}}(C_{\zeta(\boldsymbol{\mu})})} \right) \\
&\leq \left( \frac{F_{\min}^\varepsilon}{(F_{\min}^\varepsilon - \eta - 2\underline{\varepsilon}(\varepsilon, \eta))_+} \right) \left( \kappa^* + \frac{\varepsilon}{2} \right) + \frac{\eta + 2\underline{\varepsilon}(\varepsilon, \eta)}{(F_{\min}^\varepsilon - \eta - 2\underline{\varepsilon}(\varepsilon, \eta))_+},
\end{aligned}$$

where we have used (S.4) and (S.5) for the last inequality. By choosing first  $\eta$  small enough, then all components of  $\mathbf{n}_0$  big enough, the r.h.s. of the above inequality can be made smaller than  $\kappa^* + \varepsilon$ , for all  $\mathbf{n} \succ \mathbf{n}_0$  ( $\succ$  indicates the inequality holds for all components). Since  $\sum_{i=0}^M \delta_i \rightarrow 0$  as  $\boldsymbol{\mu} \rightarrow 0$ , this implies the second part of the proposition.

For the last point of the proposition, consider an arbitrary open set  $\Omega$  containing the set  $\mathcal{B}^*$ . Then  $\Omega^c := S_M \setminus \Omega$  is a compact set; therefore, the function  $G(\boldsymbol{\mu}) := \inf_{C \in \mathcal{C}, F_{\boldsymbol{\mu}}(C) > 0} \frac{F_0(C)}{F_{\boldsymbol{\mu}}(C)}$ , being upper semicontinuous (see proof of Lemma A.1), attains its supremum  $\tilde{\kappa}$  on  $\Omega^c$ . Observe that  $\tilde{\kappa} > \kappa^*$  must hold, otherwise we would have a contradiction with the definition of  $\mathcal{B}^*$ . Finally, we have:

$$\begin{aligned}
\mathbb{P}[\widehat{\boldsymbol{\mu}} \notin \Omega] &\leq \mathbb{P}[\widehat{\boldsymbol{\mu}} \notin \Omega; G(\widehat{\boldsymbol{\mu}}) \leq \widehat{G}(\widehat{\boldsymbol{\mu}})] + \mathbb{P}[G(\widehat{\boldsymbol{\mu}}) > \widehat{G}(\widehat{\boldsymbol{\mu}})] \\
&\leq \mathbb{P}[\widehat{\kappa} \geq \tilde{\kappa}] + \sum_{i=1}^M \delta_i,
\end{aligned}$$

where we have used that  $\hat{\kappa} = \hat{G}(\hat{\boldsymbol{\mu}})$  by definition, and the argument used in the proof of point (a). By point (b), the first probability converges to 0 as  $\boldsymbol{\mu} \rightarrow \infty$ . Thus, the probability that  $\hat{\boldsymbol{\mu}} \in \Omega$  must converge to 1 as  $\boldsymbol{n} \rightarrow \infty$ . This applies in particular to any open set of the form  $\Omega_\epsilon := \{\boldsymbol{\mu} : d(\boldsymbol{\mu}, \mathcal{B}^*) < \epsilon\}$ , hence the conclusion.

## B Proofs for Section 4

### B.1 Proof of Lemma 1

Suppose the first condition does not hold, so that

$$\sum_{i \in I} \epsilon_i P_i = \alpha \left( \sum_{i \notin I} \epsilon_i P_i \right) + (1 - \alpha)H.$$

Then  $\sum_i \gamma_i P_i = H$ , where  $\gamma_i = \frac{\epsilon_i}{1 - \alpha}$  for  $i \in I$ , and  $\gamma_i = -\frac{\alpha \epsilon_i}{1 - \alpha}$  for  $i \notin I$ . Since  $\sum_{i \notin I} \epsilon_i = 1$ , at least one  $\gamma_i < 0$ , so the second condition is violated.

Now suppose the second condition is violated, say  $\sum_i \gamma_i P_i = H$ . Let  $I = \{i \mid \gamma_i \geq 0\}$ , which has fewer than  $K$  elements by assumption. Since  $\sum_i \gamma_i = 1$ , we also know  $1 \leq |I|$  and further that  $\Gamma := \sum_{i \in I} \gamma_i > 1$ . A violation of the first condition is obtained by  $\epsilon_i = \gamma_i / \Gamma$  for  $i \in I$ ,  $\epsilon_i = -\gamma_i / (\Gamma - 1)$  for  $i \notin I$  (noting that  $\sum_{i \notin I} (-\gamma_i) = \Gamma - 1$ ), and  $\alpha = (\Gamma - 1) / \Gamma$ .

### B.2 Proof of Lemma 2

(a)  $\Rightarrow$  (b): Follows immediately from the definition of the residue.

(b)  $\Rightarrow$  (c): By assumption, there exists  $\kappa > 0$  such that  $\boldsymbol{\pi}_1 = \kappa \mathbf{e}_1 + (1 - \kappa) \boldsymbol{\eta}_1$ , where  $\boldsymbol{\eta}_1 = \sum_{i=2}^L \mu_i \boldsymbol{\pi}_i$ , with  $\mu_i \geq 0$ , for all  $2 \leq i \leq L$ . Thus,

$$\mathbf{e}_1 = \kappa^{-1} \boldsymbol{\pi}_1 - \sum_{i=2}^L \frac{(1 - \kappa)}{\kappa} \mu_i \boldsymbol{\pi}_i;$$

a similar relation holds for all rows. This implies that  $\Pi$  is invertible and allows to identify (for instance) the first row of  $\Pi^{-1}$  as  $(\kappa^{-1}, -\frac{(1 - \kappa)}{\kappa} \mu_2, \dots, -\frac{(1 - \kappa)}{\kappa} \mu_L)$ . This implies (c).

(c)  $\Rightarrow$  (a): Without loss of generality, consider  $\ell = 1$  and the problem of identifying  $\kappa^*(\boldsymbol{\pi}_1 \mid (\boldsymbol{\pi}_i)_{2 \leq i \leq L})$ , and the associated residue (if it exists). According to characterization (9), this corresponds to the optimization problem

$$\max_{\boldsymbol{\nu}, \boldsymbol{\gamma}} \sum_{i=2}^L \nu_i \quad \text{s.t.} \quad \boldsymbol{\pi}_1 = (1 - \sum_{i=2}^L \nu_i) \boldsymbol{\gamma} + \sum_{i=2}^L \nu_i \boldsymbol{\pi}_i,$$

over  $\boldsymbol{\gamma} \in S_L$  and  $\boldsymbol{\nu} = (\nu_2, \dots, \nu_L) \in \Delta_{L-1} = \{(\nu_2, \dots, \nu_L) \mid \nu_i \geq 0; \sum_{i=2}^L \nu_i \leq 1\}$ .

We now reformulate this problem. First, note that the constraint implies that admissible  $\nu$  are such that  $\sum_{i \geq 2} \nu_i < 1$ , otherwise we would have a linear relation between the  $\pi_i$ , contradicting invertibility of  $\Pi$ .

Then for an admissible  $\nu$ , denote  $\eta(\nu) := (1 - \sum_{i \geq 2} \nu_i)^{-1}(1, -\nu_2, \dots, -\nu_L)$ . Observe that the constraint of the optimization problem is equivalent to  $\Pi^T \eta = \gamma$ , or  $\eta = (\Pi^T)^{-1} \gamma$ . The inverse mapping of  $\eta$  to  $\nu$  is  $\nu(\eta) = \eta_1^{-1}(-\eta_2, \dots, -\eta_L)$ , so that the objective of the optimization can be rewritten as

$$-\frac{\sum_{i=2}^L \eta_i}{e_1^T \eta} = -\frac{\mathbf{1}^T \eta}{e_1^T \eta} + 1 = 1 - \frac{1}{e_1^T \eta} = 1 - \frac{1}{e_1^T (\Pi^T)^{-1} \gamma},$$

where  $\mathbf{1}$  denotes a  $L$ -dimensional vector with all coordinates equal to 1. So finding the point of maximum of the above problem is equivalent to the program

$$\max_{\gamma \in S_L} e_1^T (\Pi^T)^{-1} \gamma \quad s.t. \quad \nu((\Pi^T)^{-1} \gamma) \in \Delta_{L-1}$$

The above objective function has the form  $\mathbf{a}^T \gamma$ , where  $\mathbf{a}$  is the first column of  $\Pi^{-1}$  which, by assumption, has its first coordinate positive and the others nonpositive. Therefore, the unconstrained maximum over  $\gamma \in S_M$  is attained uniquely for  $\gamma = e_1$ . We now check that this value also satisfies the required constraint. Observe that  $(\Pi^T)^{-1} e_1$  is the (transpose of) the first row of  $\Pi^{-1}$ , denote this vector as  $\mathbf{b} = (b_1, \dots, b_L)$ . We want to ensure that  $\nu(\mathbf{b}) = b_1^{-1}(-b_2, \dots, -b_L) \in \Delta_{L-1}$ . By assumption,  $\mathbf{b}$  has its first coordinate positive and the others nonpositive, ensuring all components of  $\nu(\mathbf{b})$  are nonnegative. Furthermore, the sum of the components of  $\nu(\mathbf{b})$  is

$$\sum_{i=2}^L -\frac{b_i}{b_1} = 1 - \frac{\sum_{i=1}^L b_i}{b_1} = 1 - \frac{1}{b_1} \leq 1;$$

the last equality is because the rows of  $\Pi^{-1}$  sum to 1 (since  $\Pi$  is a stochastic matrix, so is its inverse). It follows that  $\nu((\Pi^T)^{-1} e_1) \in \Delta_{L-1}$ . Thus, the unique maximum of the optimization problem is attained for  $\gamma = e_1$ , establishing (a).

### B.3 Proof of Proposition 3

We start with the following Lemma:

**Lemma B.1.** *If  $\Pi$  is recoverable, then  $\pi_1, \dots, \pi_L$  are linearly independent. If  $P_1, \dots, P_L$  are jointly irreducible, then they are linearly independent. If  $\pi_1, \dots, \pi_L$  are linearly independent and  $P_1, \dots, P_L$  are linearly independent, then  $\tilde{P}_1, \dots, \tilde{P}_L$  are linearly independent.*

*Proof of the lemma:* The first statement follows from characterization (c) of Lemma 2: if  $\Pi$  is recoverable, it is invertible and thus has full rank.

For the second statement, suppose  $\sum_i \beta_i P_i = 0$  is a nontrivial linear relation. Let  $j$  be any index such that  $\beta_j \geq 0$ . Then  $\sum_i \gamma_i P_i = P_j$ , where  $\gamma_i = \beta_i$  if  $i \neq j$ , and  $\gamma_j = \beta_j + 1$ . Since at least one  $\beta_i < 0$ ,  $i \neq j$ , joint irreducibility is violated.

For the third part, suppose  $\sum_i \alpha_i \tilde{P}_i = 0$ . Since  $\tilde{P}_i = \pi_i^T \mathbf{P}$ , this implies  $\sum_i \alpha_i \pi_i^T \mathbf{P} = 0$ , which implies  $\sum_i \alpha_i \pi_i = \mathbf{0}$ , which implies  $\alpha_i = 0$ .

*Proof of Proposition 3:* Consider  $\ell = 1$ , the other cases being similar. Suppose  $G$  is such that

$$\tilde{P}_1 = (1 - \sum_{j \geq 2} \nu_j)G + \sum_{j \geq 2} \nu_j \tilde{P}_j. \quad (\text{S.6})$$

Note that  $\tilde{P}_1, \dots, \tilde{P}_L$  are linearly independent by Lemma B.1. This implies  $\sum_{j \geq 2} \nu_j < 1$ , because otherwise  $\tilde{P}_1 = \sum_{j \geq 2} \nu_j \tilde{P}_j$ .

Therefore, any  $G$  satisfying (S.6) has the form  $\sum_{i=1}^L \gamma_i P_i$ . The weights  $\gamma_i$  clearly sum to one, and by joint irreducibility, they are nonnegative. That is,  $\gamma := [\gamma_1, \dots, \gamma_L]^T$  is a discrete distribution. Thus, Eqn. (S.6) is equivalent to

$$\pi_1^T \mathbf{P} = (1 - \sum_{j \geq 2} \nu_j) \gamma^T \mathbf{P} + \sum_{j \geq 2} \nu_j \pi_j^T \mathbf{P}.$$

By linear independence of  $P_1, \dots, P_L$  (see Lemma B.1) and taking the transpose, this gives

$$\pi_1 = (1 - \sum_{j \geq 2} \nu_j) \gamma + \sum_{j \geq 2} \nu_j \pi_j.$$

Therefore  $\kappa^*(\tilde{P}_1 | \{\tilde{P}_j, j \neq 1\}) = \kappa^*(\pi_1 | \{\pi_j, j \neq 1\}) < 1$ , and there is a one-to-one correspondence between feasible  $G$  in the definition of  $\kappa^*(\tilde{P}_1 | \{\tilde{P}_j, j \neq 1\})$  and feasible  $\gamma$  in the definition of  $\kappa^*(\pi_1 | \{\pi_j, j \neq 1\})$ . Since  $\Pi$  is recoverable, the residue of  $\pi_1$  w.r.t.  $\{\pi_j, j \neq 1\}$  is  $\gamma = e_1$ , and so the residue of  $\tilde{P}_1$  w.r.t.  $\{\tilde{P}_j, j \neq 1\}$  is  $G = e_1^T \mathbf{P} = P_1$ .

To see uniqueness of the maximizing  $\nu_j$ , suppose

$$\tilde{P}_1 = (1 - \kappa^*)G + \sum_{j \geq 2} \nu_j \tilde{P}_j = (1 - \kappa^*)G + \sum_{j \geq 2} \nu'_j \tilde{P}_j.$$

Lemma B.1 implies  $\nu_j = \nu'_j$ .

## B.4 Proof of Proposition 4

For brevity we at times omit the dependence of the errors and their estimates on  $f$ . For any  $f$ ,

$$\begin{aligned} |R_\ell(f) - \hat{R}_\ell(f)| &= \left| \frac{\tilde{R}_{\ell\ell} - \sum_{j \neq \ell} \nu_{\ell j} \tilde{R}_{j\ell}}{1 - \kappa_\ell} - \frac{\hat{\tilde{R}}_{\ell\ell} - \sum_{j \neq \ell} \hat{\nu}_{\ell j} \hat{\tilde{R}}_{j\ell}}{1 - \hat{\kappa}_\ell} \right| \\ &\leq \left| \frac{\tilde{R}_{\ell\ell} - \sum_{j \neq \ell} \nu_{\ell j} \tilde{R}_{j\ell}}{1 - \kappa_\ell} - \frac{\hat{\tilde{R}}_{\ell\ell} - \sum_{j \neq \ell} \hat{\nu}_{\ell j} \hat{\tilde{R}}_{j\ell}}{1 - \kappa_\ell} \right| \\ &\quad + \left| \frac{\hat{\tilde{R}}_{\ell\ell} - \sum_{j \neq \ell} \hat{\nu}_{\ell j} \hat{\tilde{R}}_{j\ell}}{1 - \kappa_\ell} - \frac{\hat{\tilde{R}}_{\ell\ell} - \sum_{j \neq \ell} \hat{\nu}_{\ell j} \hat{\tilde{R}}_{j\ell}}{1 - \hat{\kappa}_\ell} \right| \end{aligned}$$

$$\begin{aligned}
&\leq \frac{|\tilde{R}_{\ell\ell} - \hat{R}_{\ell\ell}| + \sum_{j \neq \ell} |\nu_{\ell j} \tilde{R}_{j\ell} - \hat{\nu}_{\ell j} \hat{R}_{j\ell}|}{1 - \kappa_\ell} + \left| \frac{1}{1 - \kappa_\ell} - \frac{1}{1 - \hat{\kappa}_\ell} \right| \\
&= \frac{|\tilde{R}_{\ell\ell} - \hat{R}_{\ell\ell}| + \sum_{j \neq \ell} \left( |\nu_{\ell j} \tilde{R}_{j\ell} - \hat{\nu}_{\ell j} \tilde{R}_{j\ell}| + \hat{\nu}_{\ell j} \tilde{R}_{j\ell} - \hat{\nu}_{\ell j} \hat{R}_{j\ell} \right)}{1 - \kappa_\ell} \\
&\quad + \left| \frac{1}{1 - \kappa_\ell} - \frac{1}{1 - \hat{\kappa}_\ell} \right| \\
&\leq \frac{|\tilde{R}_{\ell\ell} - \hat{R}_{\ell\ell}| + \sum_{j \neq \ell} \left( |\nu_{\ell j} - \hat{\nu}_{\ell j}| + |\tilde{R}_{j\ell} - \hat{R}_{j\ell}| \right)}{1 - \kappa_\ell} + \left| \frac{1}{1 - \kappa_\ell} - \frac{1}{1 - \hat{\kappa}_\ell} \right|.
\end{aligned}$$

The VC inequality [1] implies that for any  $\epsilon > 0$ ,  $\sup_{f \in \mathcal{F}_{k(\mathbf{n})}} |R_{i\ell}(f) - \hat{R}_{i\ell}(f)| \leq \epsilon$  with probability tending to 1, since (12) holds, and by our convention for multiclass VC dimension. Noting that  $\kappa_\ell < 1$  by Proposition 3, the other terms tend to zero in probability by consistency of  $\hat{\kappa}_\ell$  and the  $\hat{\nu}_{\ell j}$ . This completes the proof.

## B.5 Proof of Theorem 1

Consider the decomposition into estimation and approximation errors,

$$R(\hat{f}) - R^* = R(\hat{f}) - \inf_{f \in \mathcal{F}_{k(\mathbf{n})}} R(f) + \inf_{f \in \mathcal{F}_{k(\mathbf{n})}} R(f) - R^*.$$

The approximation error converges to zero by **P3** and since  $k(\mathbf{n}) \rightarrow \infty$ . To analyze the estimation error, let  $\epsilon > 0$ . For each positive integer  $k$ , let  $f_k^* \in \mathcal{F}_k$  such that  $R(f_k^*) \leq \inf_{f \in \mathcal{F}_k} R(f) + \frac{\epsilon}{4}$ . Then

$$\begin{aligned}
R(\hat{f}) - \inf_{f \in \mathcal{F}_{k(\mathbf{n})}} R(f) &= R(\hat{f}_{k(\mathbf{n})}) - \inf_{f \in \mathcal{F}_{k(\mathbf{n})}} R(f) \\
&\leq R(\hat{f}_{k(\mathbf{n})}) - R(f_{k(\mathbf{n})}^*) + \frac{\epsilon}{4} \\
&\leq \hat{R}(\hat{f}_{k(\mathbf{n})}) - \hat{R}(f_{k(\mathbf{n})}^*) + \frac{\epsilon}{2} \\
&\quad \text{(with probability tending to 0, by Proposition 4)} \\
&\leq \tau_{k(\mathbf{n})} + \frac{\epsilon}{2} \\
&\leq \epsilon
\end{aligned}$$

where the last step holds for  $\mathbf{n}$  sufficiently large. The result now follows.

## References

- [1] L. Devroye, L. Györfi, and G. Lugosi. *A Probabilistic Theory of Pattern Recognition*. Springer, 1996.
